# Supplementary material for: Alteration of long- and short-term hematopoietic stem cell ratio causes myeloid-biased hematopoiesis
Source: eLife. 2025 Aug 27;13:RP95880. doi: 10.7554/eLife.95880 (PMC12387747; doi:10.7554/eLife.95880)
Supplement: Supplementary file 1. [file elife-95880-supp1.xlsx]

## Sheet: Sheet2
Antibody information
	Antigen	Clone	Fluorochrome	Vendor	RRID
Mouse bone marrow analysis	Flk2	A2F10	PerCP-eFluor710	Thermo Fisher Scientific	AB_10733392
	CD34	RAM34	FITC	Thermo Fisher Scientific	AB_465021
		RAM34	Alexa Fluor 647	BD Bioscience	AB_657739
	CD11b	M1/70	BV711	BD Bioscience	AB_2716860
		M1/70	BV650	BD Bioscience	AB_2738184
		M1/70	Alexa Fluor 700	Biolegend	AB_493705
	CD150	TC15-12F12.2	BV421	Biolegend	AB_2650881
		TC15-12F12.2	Alexa Fluor 647	Biolegend	AB_2239178
	CD3ε	145-2C11	Biotin	Biolegend	AB_312669
	CD3	17A2	Alexa Fluor 700	Biolegend	AB_493697
	CD4	GK 1.5	Biotin	Biolegend	AB_312689
		GK 1.5	Alexa Fluor 700	Biolegend	AB_493699
	CD8a	53-6.7	Biotin	Biolegend	AB_312743
		53-6.7	Alexa Fluor 700	Biolegend	AB_493703
	Ter-119	TER-119	Biotin	Biolegend	AB_313705
		TER-119	Alexa Fluor 700	Biolegend	AB_528963
	Gr-1	RB6-8C5	Biotin	Biolegend	AB_313369
		RB6-8C5	Alexa Fluor 700	Biolegend	AB_2137487
	B220	RA3-6B2	Biotin	Biolegend	AB_312989
		RA3-6B2	Alexa Fluor 700	Biolegend	AB_493717
	CD127	A7R34	Alexa Fluor 700	Thermo Fisher Scientific	AB_657611
		A7R34	PE	Biolegend	AB_1937251
		A7R34	PerCP/Cyanine5.5	Biolegend	AB_1937273
	CD16/32	93	Alexa Fluor 700	Thermo Fisher Scientific	AB_493994
		93	FITC	Biolegend	AB_312805
		93	Biotin	Biolegend	AB_312802
	Sca-1	D7	BUV395	BD Bioscience	AB_2738527
	c-Kit	2B8	APC-eFluor 780	Thermo Fisher Scientific	AB_1272177
	Streptavidin		BUV737	BD Bioscience	cat# 612775
			BV421	Biolegend	cat# 405225
	CD45.1	A20	Biotin	Biolegend	AB_313493
		A20	BV421	Biolegend	AB_2562563
	CD45.2	104	BV785	Biolegend	AB_2562604
		104	BV650	Biolegend	AB_2563065
Mouse peripheral blood analysis	CD45.1	A20	FITC	BD Bioscience	AB_395043
		A20	Biotin	Biolegend	AB_313493
		A20	BUV737	BD Bioscience	AB_2870136
	CD45.2	104	PE	BD Bioscience	AB_1727493
		104	BUV395	BD Bioscience	AB_2738867
	Gr-1	RB6-8C5	Alexa Fluor 700	Biolegend	AB_2137487
	CD11b	M1/70	BUV395	BD Bioscience	AB_2738276
		M1/70	BV711	BD Bioscience	AB_2716860
		M1/70	PerCP/Cyanine5.5	Biolegend	AB_893232
	NK1.1	PK136	PerCP/Cyanine5.5	Biolegend	AB_2132705
		PK136	BV605	Biolegend	AB_2686977
	CD3ε	145-2C11	BV421	Biolegend	AB_2562556
		145-2C11	APC/Cyanine7	Biolegend	AB_1877170
	TCRß	H57-597	BV421	Biolegend	AB_2562562
		H57-597	APC/Cyanine7	Biolegend	AB_893624
	B220	RA3-6B2	BV786	BD Bioscience	AB_2738472
	Streptavidin		BV421	Biolegend	cat# 405225
T cell phenotyping	CD4	GK 1.5	APC/Cyanine7	Biolegend	AB_312699
	CD8a	53-6.7	PerCP/Cyanine5.5	Biolegend	AB_2075238
	CD44	IM7	BV421	Biolegend	AB_2616903
	CD62L	MEL-14	Biotin	Biolegend	AB_313091
	Streptavidin		BUV737	BD Bioscience	cat# 612775
Spleen and thymus analysis	B220	RA3-6B2	BV786	BD Bioscience	AB_2738472
	CD4	GK 1.5	APC/Cyanine7	Biolegend	AB_312699
	CD8a	53-6.7	PerCP/Cyanine5.5	Biolegend	AB_2075238
	CD44	IM7	BV421	Biolegend	AB_2616903
	CD25	PC61	BUV395	BD Bioscience	AB_2722574
